# Supplementary material for: CFSAN SNP Pipeline: an automated method for constructing SNP matrices from next-generation sequence data
Source: PeerJ journal article supplement (doi:10.7717/peerj-cs.20), 2015-08-26
Supplement: SupplementalDataS1_JSP.docx [file SupplementalDataS1_JSP.docx]

Script to download the *Salmonella* Agona reference genome:

| mkdir reference  cd reference  wget https://raw.githubusercontent.com/CFSAN-Biostatistics/snp-pipeline/master/snppipeline/data/agonaInputs/reference/NC_011149.fasta |
| --- |

Script to generate 1000 mutated genomes – assumes you have downloaded SNP mutator:

| #!/bin/bash  mkdir -p replicates  snpmutator.py -r 1 -o summary.tsv -n 1000 reference/NC_011149.fasta  mv *.fasta replicates |
| --- |

Script to generate simulated Illumina fastq files at 100x coverage – assumes software art installed:

| #!/bin/bash  function runart  {  basefile=$1  inputFile=replicates/$basefile.fasta  outputDir=artsamples/$basefile  mkdir -p $outputDir  outputFile=$outputDir/${basefile}_  art_illumina --noALN -i $inputFile -p -l 250 -ss MS -f 100 -m 500 -s 10 -rs 1 -o $outputFile  }  export -f runart  seq 1 1000 | xargs -I @ -P 8 bash -c "runart NC_011149_mutated_@" |
| --- |

Script to generate simulated Illumina fastq files at 20x coverage – assumes the software art installed:

| #!/bin/bash  function runart  {  basefile=$1  inputFile=replicates/$basefile.fasta  outputDir=artsamples/$basefile  mkdir -p $outputDir  outputFile=$outputDir/${basefile}_  art_illumina --noALN -i $inputFile -p -l 250 -ss MS -f 20 -m 500 -s 10 -rs 1 -o $outputFile  }  export -f runart  seq 1 1000 | xargs -I @ -P 8 bash -c "runart NC_011149_mutated_@" |
| --- |

Script to run the CFSAN SNP Pipeline – assumes CFSAN SNP Pipeline is installed along with Bowtie2 v2.2.2 , VarScan v2.3.9, and samtools v0.1.19:

| mkdir snppipelineworkdir  copy_snppipeline_data.py configurationFile  echo 'Bowtie2Align_ExtraParams="--reorder -q -X 547"' >> snppipeline.conf  run_snp_pipeline.sh –m soft -c snppipeline.conf -o snppipelineworkdir -s artsamples NC_011149.fasta |
| --- |
